# Supplementary material for: Enhancing therapeutic effects and in vivo tracking of adipose tissue-derived mesenchymal stem cells for liver injury using bioorthogonal click chemistry
Source: Royal Society of Chemistry journal article supplement (doi:10.1039/d0nr07272a), 2020-12-16
Supplement: d0nr07272a1.pdf [file d0nr07272a1.pdf]

**Supporting information for**  
**Enhancing therapeutic effects and *in vivo* tracking of**  
**adipose tissue derived mesenchymal stem cells for liver**  
**injury using bioorthogonal click chemistry**

Naishun Liao, ‡<sup>a, b, c</sup> Da Zhang, ‡<sup>b, c</sup> Ming Wu,<sup>b, c</sup> Huanghao Yang,<sup>a</sup> Xiaolong Liu\*<sup>b, c</sup>  
and Jibin Song\*<sup>a</sup>

<sup>a</sup> MOE Key Laboratory for Analytical Science of Food Safety and Biology, Fujian Provincial Key Laboratory of Analysis and Detection Technology for Food Safety, State Key Laboratory of Photocatalysis on Energy and Environment, College of Chemistry, Fuzhou University, Fuzhou 350108, P.R. China

<sup>b</sup> The United Innovation of Mengchao Hepatobiliary Technology Key Laboratory of Fujian Province, Mengchao Hepatobiliary Hospital of Fujian Medical University, Fuzhou 350025, P.R. China

<sup>c</sup> The Liver Center of Fujian Province, Fujian Medical University, Fuzhou 350025, P.R. China

‡These authors contributed equally to this work.

\*Corresponding author: xiaoloong.liu@gmail.com; jibinsong@fzu.edu.cn

## Results

**Table S1.** The detailed information of peptide sequences

| Name                 | Sequence                                 |
|----------------------|------------------------------------------|
| RK                   | RLTRKRGLK                                |
| DBCO-RK              | DBCO-RLTRKRGLK                           |
| FITC-RK              | FITC-RLTRKRGLK (C-terminal modification) |
| FITC labeled DBCO-RK | DBCO-RLTRKRGLK-FITC                      |
| AK                   | AAAAAAGLK                                |
| DBCO-AK              | DBCO-AAAAAAGLK                           |

The letters in red represent mutations.

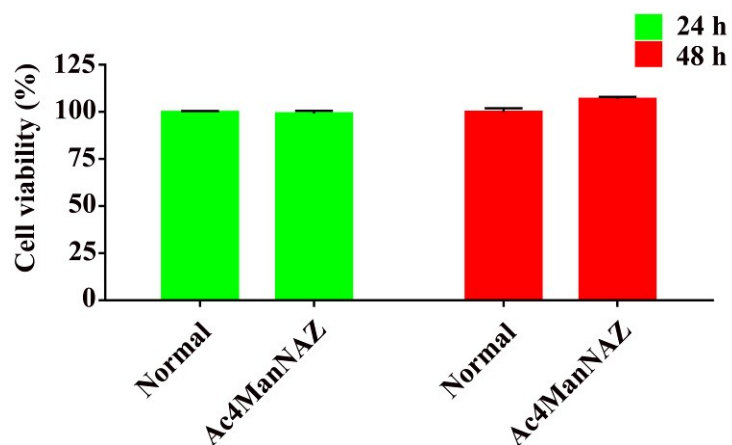

**Fig.S1.** The relative cell viability of ADSCs after incubation with Ac4ManNAz (50  $\mu$ M) for 24 h and 48 h, respectively.

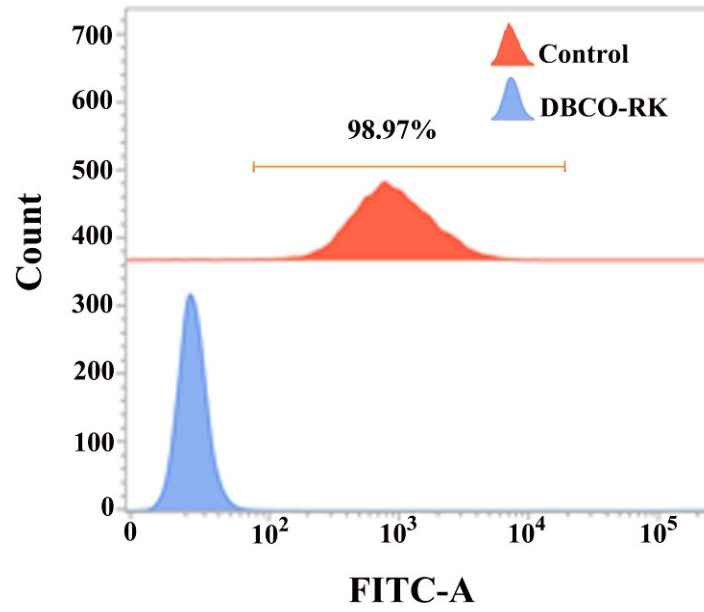

Fig.S2. The modification rate of RK on ADSCs.

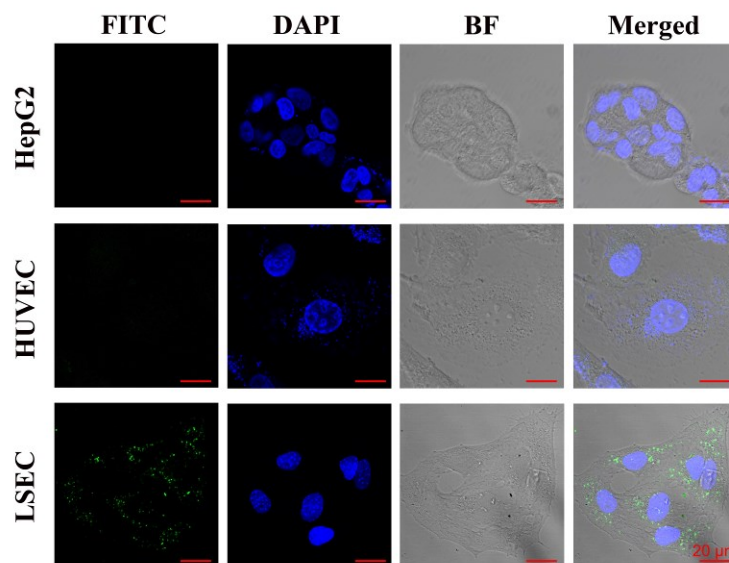

Fig.S3. The specific targeting of RK on LSECs. Scale bar, 20 μm.

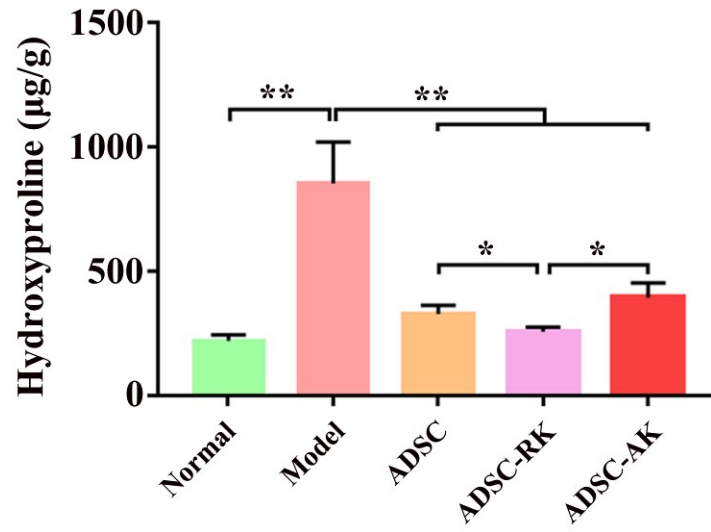

**Fig.S4.** The hydroxyproline content of liver tissues after ADSC therapy for liver fibrotic mice. (\*\* $p < 0.01$ ; \* $p < 0.05$ ;  $n = 4$  per group).

## **Experimental**

### **Material**

N-azidoacetylmannosamine (Ac4ManNAz) and 4, 6-diamidino-2-phenylindole (DAPI) were obtained from Sigma. CCK8 assay kit and PI/Annexin V apoptosis detection kit were purchased from Dojindo Molecular Technologies (Tokyo, Japan). Dil was obtain from Beyotime Biotechnology (Shanghai, China). Deionized water (ddH<sub>2</sub>O with a resistivity of 18.2 MΩ cm was obtained by using a Milli-Q Gradient System (Millipore, Bedford, MA, USA) and used for all experiments. All peptides were chemically synthesized by GenScript (Nanjing, China). All other chemicals, if otherwise not specified, were commercially available and used as received.

### **Cell Culture**

The human liver cancer cell line HepG2 (ATCC, Manassas, VA) was cultured with Dulbecco's Modified Eagle's medium (DMEM) containing 10% fetal bovine serum (FBS). Human umbilical vein endothelial cell (HUVEC) was obtained from National Institutes for Food and Drug Control (Beijing, China) and cultured with RPMI 1640 containing 10% FBS. Liver sinusoidal endothelial cells (LSEC) were isolated from mouse liver tissues and purchased from Servicebio (Wuhan, China), and cultured in LSEC specific medium (Servicebio, Wuhan, China). All cells were incubated in a 37 °C humidified incubator containing 5% CO<sub>2</sub>.

### **Cytotoxicity assay in vitro**

The cytotoxicity of Ac4ManNAz was evaluated by CCK8 assay. Briefly, ADSCs were seeded into a 96-well plate at the density of  $1 \times 10^4$  cells/well and co-incubated

with 50  $\mu$ M Ac4ManNAz for 24 h, 48 h, respectively. After that, the cells were added with CCK8 solution for another 1h and the absorbance at 450 nm was measured in a Spectra Max M5 microplate reader (Molecular Devices, USA).

### **CLSM imaging of RK specific targeting to LSEC**

Mouse LSEC cells or positive control cells (including HUVEC and HepG2 cells) were seeded into a 35 mm-glass bottom petri dishes at a density of  $1 \times 10^5$  cells per dish and cultured at a 37 °C humidified incubator containing 5% CO<sub>2</sub> over night. Afterwards, the cells were co-incubated with 50  $\mu$ M RK for 4 h. After washing with PBS buffer, the cells were fixed with 4% paraformaldehyde (PFA) and stained with DAPI. Finally, the cells were imaged with CLSM (LSM 780, Zeiss, Germany).

### **Biochemical assays of liver function**

The hydroxyproline content in fibrotic liver tissues was analyzed by biochemical analysis using a colorimetric assay kit (Nanjing Jiancheng Bioengineering Institute, Nanjing, China) following manufacture's instructions.
